# Supplementary material
Source: Royal Society of Chemistry journal article supplement (doi:10.1039/d5cp03645c)
Supplement: d5cp03645c2.pdf [file d5cp03645c2.pdf]

# Probing stability of exocyclic BN-doped fulvenes in ground state: 1-aminoboroles vs 1-pyrroloboranes

Alvi Muhammad Rouf,<sup>\*a</sup> Ahmad Raza Ashraf,<sup>a</sup> Areej Fatima,<sup>a</sup> Imra Kousar,<sup>a</sup> Muhammad Faizan Nazar,<sup>\*a</sup> and Shahbaz Ahmed<sup>a</sup>

<sup>a</sup>Department of Chemistry, Division of Science and Technology, University of Education, Lahore, 54770, Pakistan. E-mail: [rouf.alvi@ue.edu.pk](mailto:rouf.alvi@ue.edu.pk); [raufasham@hotmail.com](mailto:raufasham@hotmail.com); [faizan.nazar@ue.edu.pk](mailto:faizan.nazar@ue.edu.pk)

## Supporting Information

|                                                                                                                     |    |
|---------------------------------------------------------------------------------------------------------------------|----|
| 1. Infra Red (IR) Spectra.....                                                                                      | 1  |
| 2. Relative Energy .....                                                                                            | 5  |
| 3. Stability of Charge and Multiplicity.....                                                                        | 5  |
| 4. Positional Isomerization Energies in BN-Fulvenes P and B.....                                                    | 6  |
| 5. Bond Dissociation Energy (BDE).....                                                                              | 6  |
| 6. Aromaticity Indices: NICS(1) <sub>zz</sub> , $\Delta$ BL, and Electron Density of Delocalized Bonds (EDDB) ..... | 7  |
| 7. Dipole Moment and Natural Population Analysis (NPA) Charges .....                                                | 10 |
| 8. Frontier Molecular Orbitals (FMOs).....                                                                          | 12 |
| 9. Cartesian Coordinates and Absolute Energies (Es).....                                                            | 15 |
| 10. Reference.....                                                                                                  | 15 |

## 1. Infra Red (IR) Spectra

The infra red (IR) frequency analysis exhibit positive values for vibrational modes of all BN-fulvenes indicating energy minima (Figures S1–S3). The major IR frequencies recognizing important bonds are given in Table S1 and summarized as (1) 570–914  $\text{cm}^{-1}$  (wagging: ring C–H bonds, may also include C–B/ C–N bonds), (2) 1318–1725  $\text{cm}^{-1}$  (stretching: B–N bond) and (3) 1551–1718  $\text{cm}^{-1}$  (asymmetric stretching: ring C=C bonds).

Table S1: Global charge and multiplicity analysis for the parent BN-fulvenes P-1H and B-1H. Frequencies are given in  $\text{cm}^{-1}$ . The abbreviations (w) and (v.w) represent weak and very weak vibrations, respectively.

| BN-fulvenes        | Ring C–H bonds (Wagging) | B–N bond (Stretching)        | Ring C=C bonds (Stretching) | BN-fulvenes        | Ring C–H bonds (Wagging) | B–N bond (Stretching)  | Ring C=C bonds (Stretching) |
|--------------------|--------------------------|------------------------------|-----------------------------|--------------------|--------------------------|------------------------|-----------------------------|
| P-1H               | 783                      | 1387, 1478, 1539             |                             | B-1H               | 570, 676                 | 1443, 1653             |                             |
| P-1NH <sub>2</sub> | 761                      | 1393, 1425, 1455, 1533       |                             | B-1NH <sub>2</sub> | 774                      | 1527, 1725             |                             |
| P-1OMe             | 770                      | 1395, 1407, 1467, 1535, 1540 |                             | B-1OMe             | 758                      | 1549 (w)               |                             |
| P-1CN              | 787                      | 1407, 1515, 1553             |                             | B-1CN              | 765                      | 1330, 1391             | 1622 (w)                    |
| P-1F               | 695, 778                 | 1418, 1434, 1508, 1545       |                             | B-1F               | 749                      | 1619 (v.w)             |                             |
| P-1Cl              | 779, 839                 | 1384, 1475, 1536             |                             | B-1Cl              | 757                      | 1438                   |                             |
| P-2NH <sub>2</sub> | 806                      | 1402, 1410, 1473             | 1688, 1730                  | B-2NH <sub>2</sub> | 728 (w)                  | 1657, 1632, 1670       | 1690                        |
| P-2OMe             | 765                      | 1409, 1459, 1483             | 1680, 1685                  | B-2OMe             | 709 (w), 840 (w)         | 1366, 1499 (w)<br>1640 | 1678                        |
| P-2CN              | 850 (w)                  | 1353, 1451                   |                             | B-2CN              | 710                      | 1475 (w), 1662         |                             |
| P-2F               | 803                      | 1365, 1410, 1467             | 1690, 1716                  | B-2F               | 695                      | 1349, 1498, 1650       | 1718                        |
| P-2Cl              | 815 (w)                  | 1318, 1355, 1428             | 1551, 1647                  | B-2Cl              | 684                      | 1474                   | 1677 (w)                    |
| P-3NH <sub>2</sub> | 818 (w)                  | 1445, 1502                   | 1680                        | B-3NH <sub>2</sub> | 658, 702, 830            | 1431, 1644             | 1678                        |
| P-3OMe             | 792 (w)                  | 1440, 1504                   | 1651                        | B-3OMe             | 853                      | 1386, 1658             | 1689                        |
| P-3CN              | 885 (w)                  | 1398, 1458                   | 1599                        | B-3CN              | 914 (w)                  | 1462, 1663             |                             |
| P-3F               | 829 (w)                  | 1455, 1492                   | 1660                        | B-3F               | 864                      | 1403, 1652             | 1707                        |
| P-3Cl              | 844 (w)                  | 1360, 1469                   | 1570 (w)                    | B-3Cl              | 867                      | 1264, 1447, 1657       | 1648 (v.w)                  |

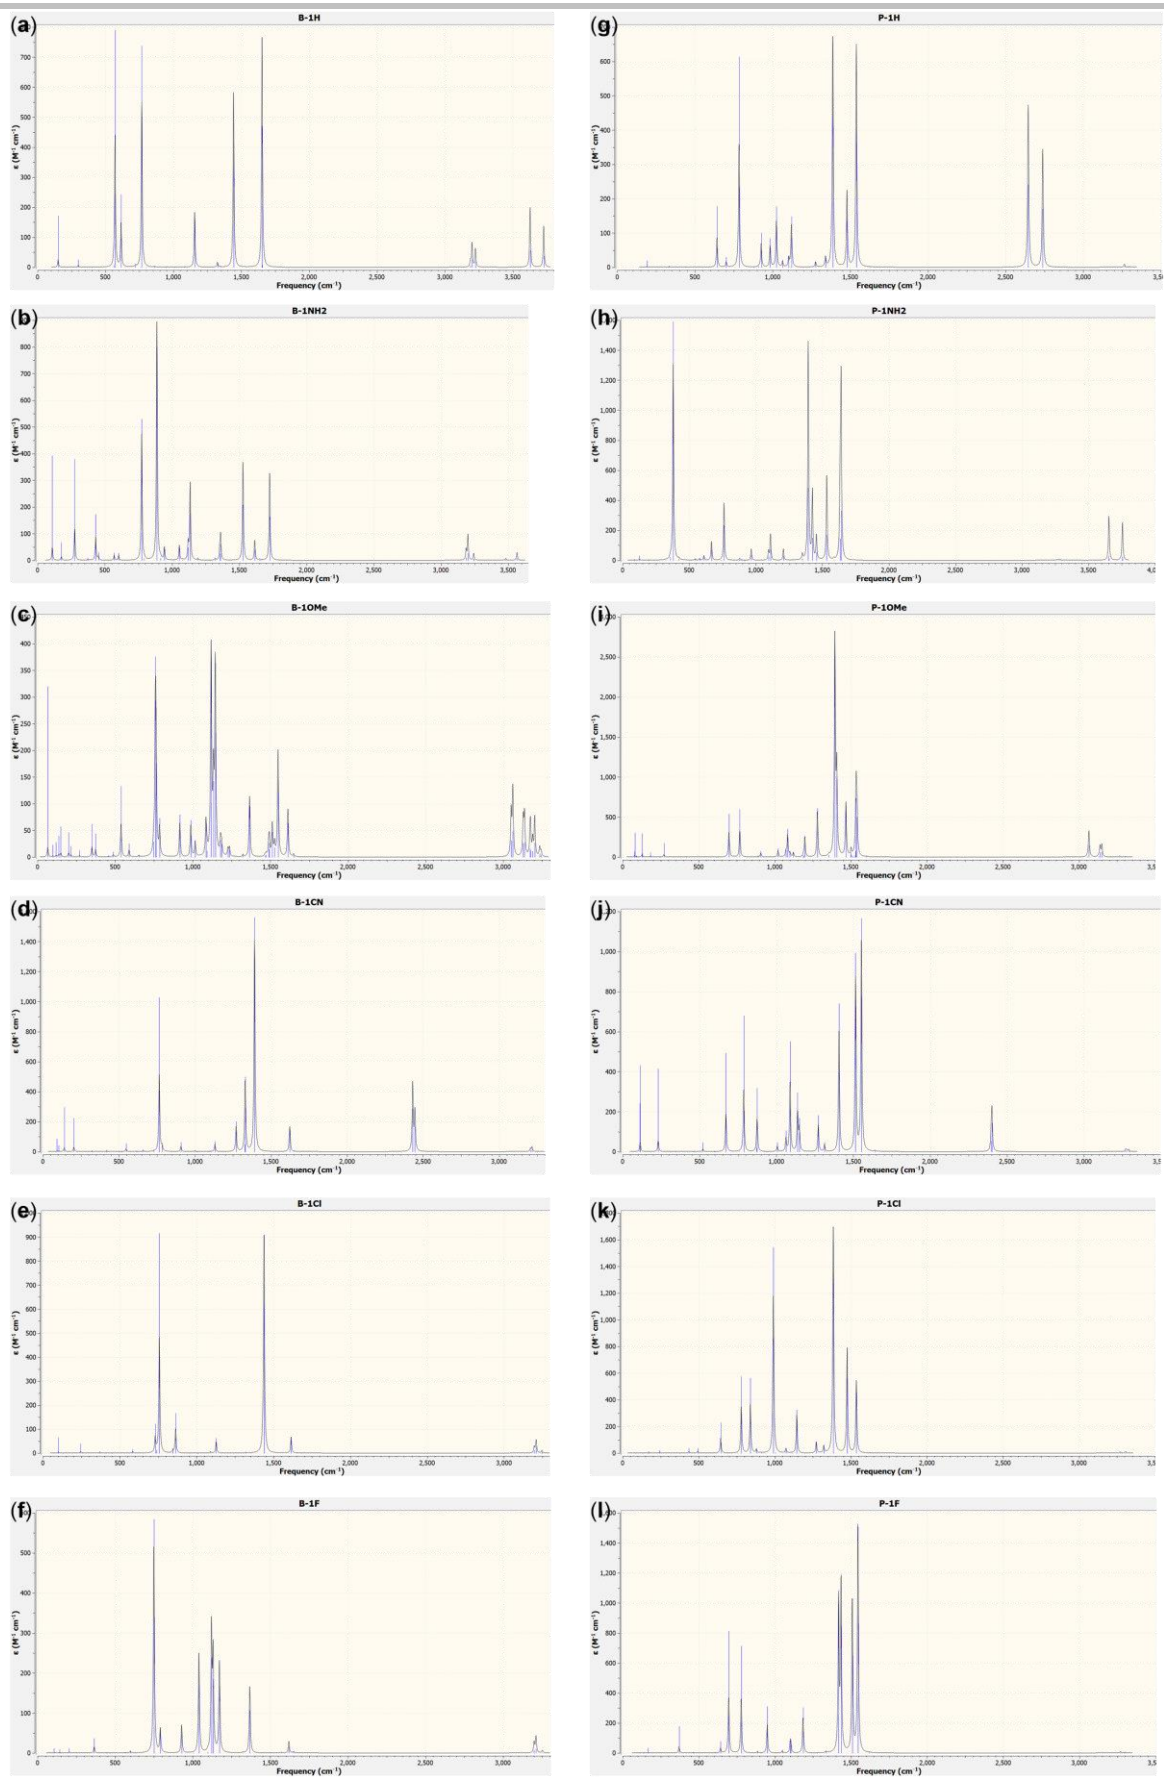

Figure S1. IR spectra of B-1X (a – f) and P-1X fulvenes (g – l).

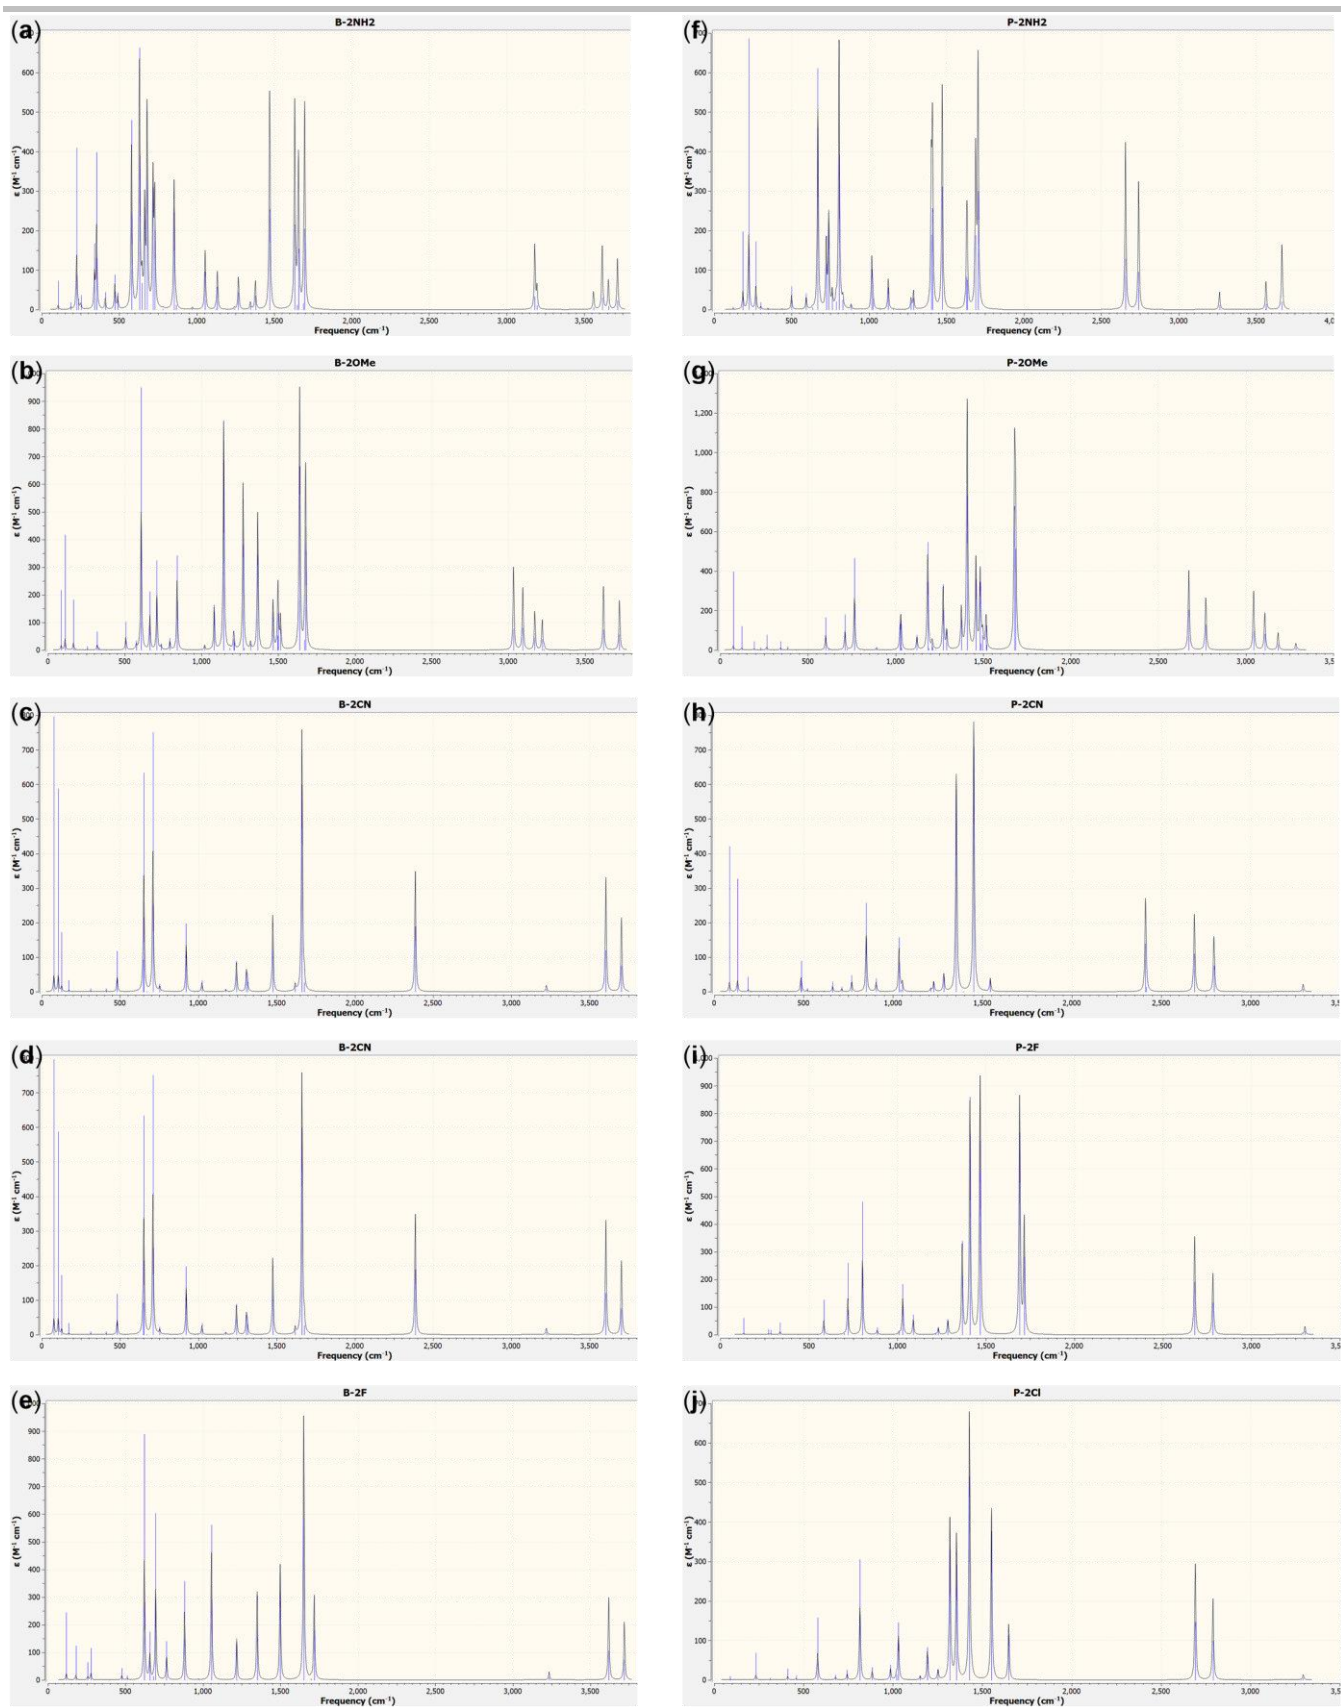

Figure S2. IR spectra of B-2Y (a – e) and P-2Y fulvenes (f – j).

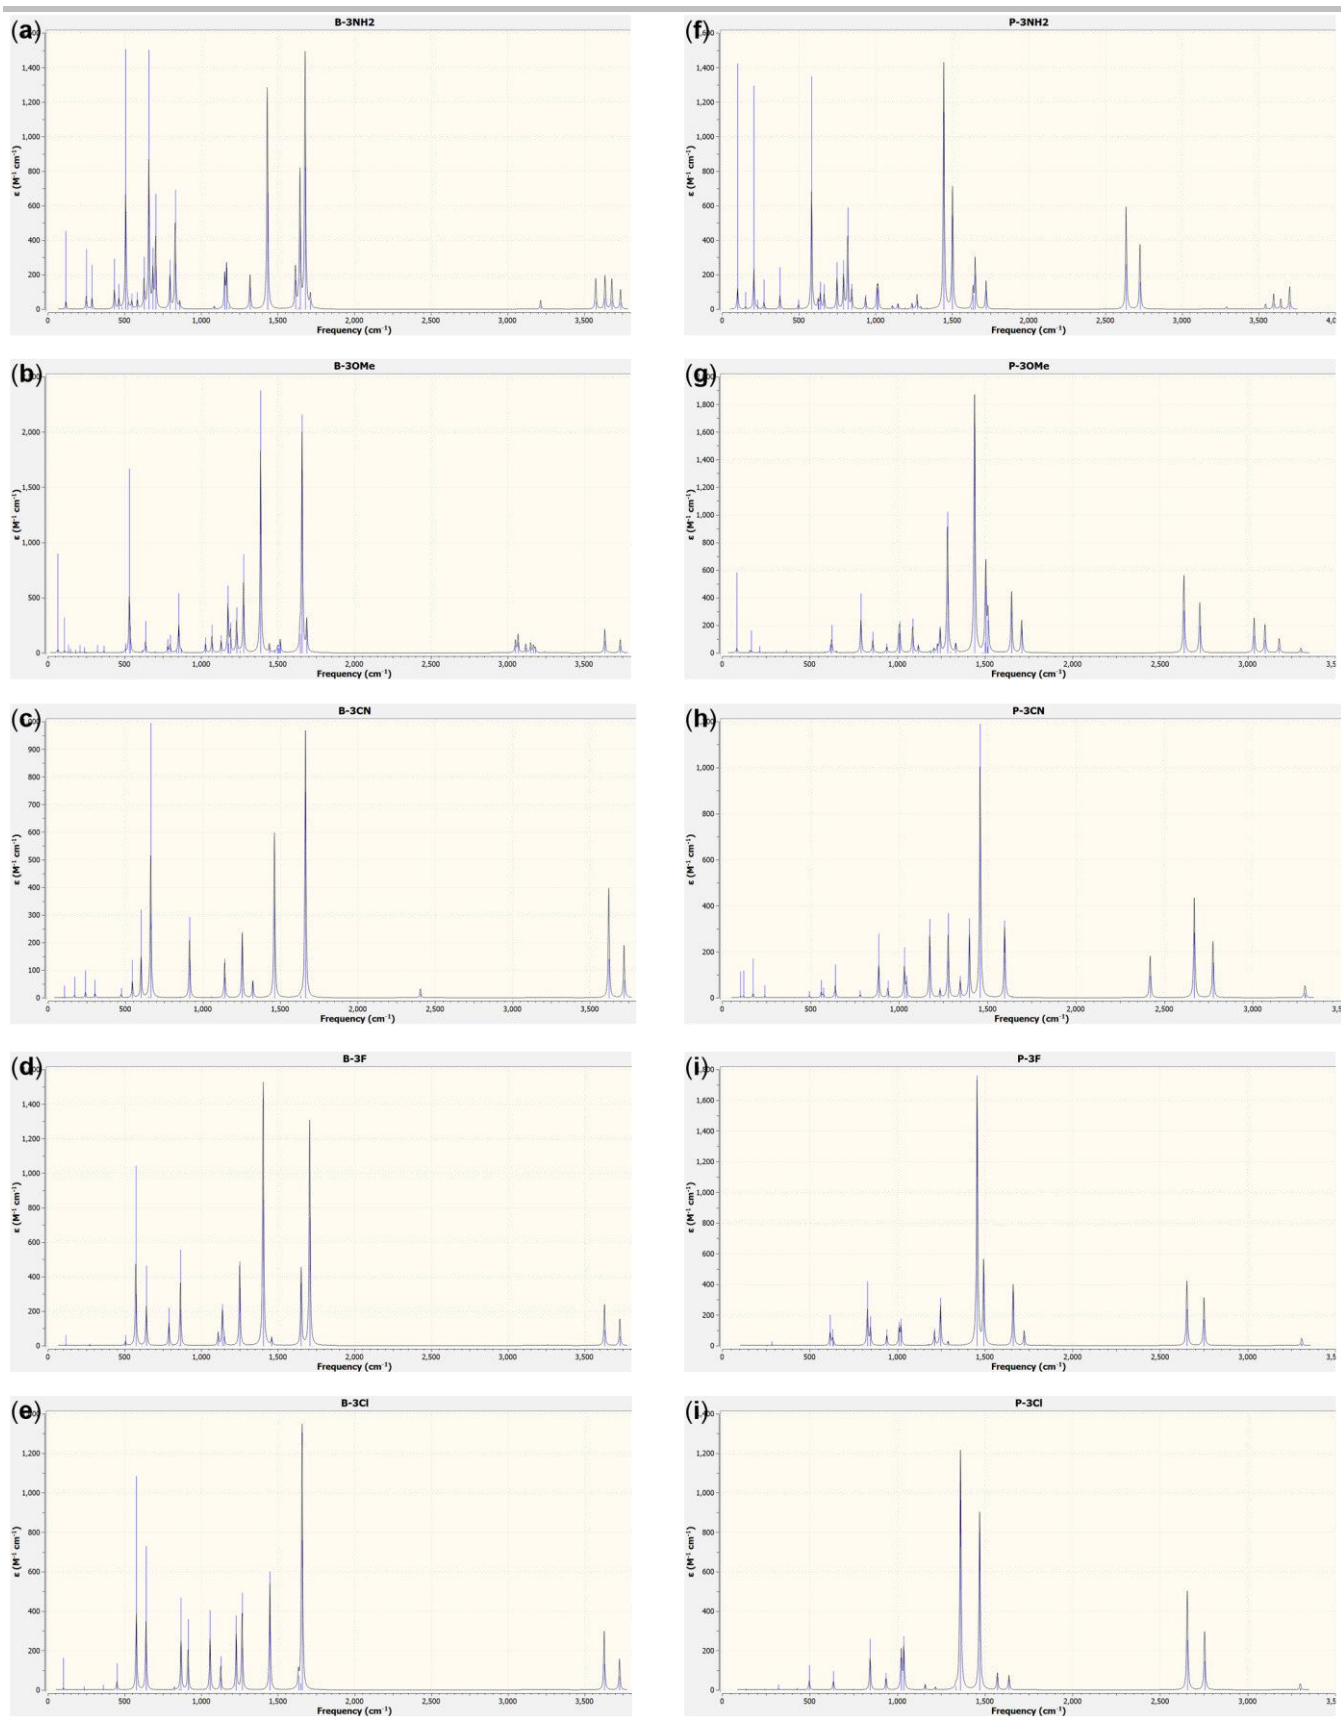

Figure S3. IR spectra of B-3Z (a – e) and P-3Z fulvenes (f – j).

## 2. Relative Energy

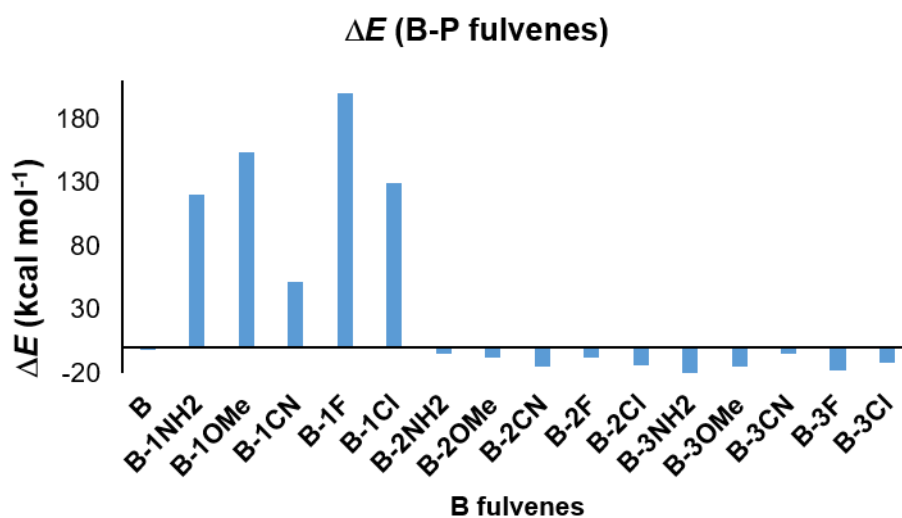

Figure S4. Relative energy ( $\Delta E$ ) of BN-fulvenes. Where  $\Delta E$  = electronic energy of B – electronic energy of P.

## 3. Stability of Charge and Multiplicity

A sweep of charge and multiplicity of the parent P-1H and B-1H fulvenes reveals that the former is stabilized and the latter is multiplicity stabilized and charge destabilized. Charge destabilization of the latter is associated with the high electron deficiency of the borole structure that becomes stabilized when it gains electron.

Table S2: Global charge and multiplicity analysis for the parent BN-fulvenes P-1H and B-1H.

| BN-fulvene  | Charge | Multiplicity | $E$ (hartrees) | $\Delta E$ (hartrees) | $\Delta E$ (kcal mol <sup>-1</sup> ) | $\Delta E$ (eV) |
|-------------|--------|--------------|----------------|-----------------------|--------------------------------------|-----------------|
| <b>P1-H</b> | 0      | 1            | -235.600831    | 0                     | 0                                    | 0               |
|             | 0      | 3            | -235.487559    | 0.113272              | 71.07931272                          | 3.082287435     |
|             | 0      | 5            | -235.306907    | 0.293924              | 184.4402492                          | 7.998077655     |
|             | 1      | 2            | -235.289207    | 0.311624              | 195.5471762                          | 8.479719081     |
|             | -1     | 2            | -235.591794    | 0.009037              | 5.67080787                           | 0.245909241     |
| <b>B1-H</b> | 0      | 1            | -235.6031875   | 0                     | 0                                    | 0               |
|             | 0      | 3            | -235.546136    | 0.0570515             | 35.80038677                          | 1.552450046     |
|             | 0      | 5            | -235.38353     | 0.2196575             | 137.8372778                          | 5.977183702     |
|             | 1      | 2            | -235.302252    | 0.3009355             | 188.8400356                          | 8.188870246     |
|             | 1      | 4            | -235.205277    | 0.3979105             | 249.6928179                          | 10.82769382     |
|             | 1      | 6            | -235.017032    | 0.5861555             | 367.8184378                          | 15.95010005     |
|             | -1     | 2            | -235.609879    | -0.0066915            | -4.198983165                         | -0.182084949    |
|             | -1     | 4            | -235.509211    | 0.0939765             | 58.97119351                          | 2.557230253     |

## 4. Positional Isomerization Energies in BN-Fulvenes P and B

Table S3: Positional isomers of BN-Fulvenes P and B, and their relative isomer energies ( $\Delta E$ -iso).

| Fulvene            | $\Delta E$ -iso | Fulvene            | $\Delta E$ -iso |
|--------------------|-----------------|--------------------|-----------------|
| P-1NH <sub>2</sub> | 0               | B-1NH <sub>2</sub> | 0               |
| P-2NH <sub>2</sub> | 72.4            | B-2NH <sub>2</sub> | -53             |
| P-3NH <sub>2</sub> | 73.7            | B-3NH <sub>2</sub> | -66.1           |
| P-1OMe             | 0               | B-1OMe             | 0               |
| P-2OMe             | 81.7            | B-2OMe             | -79.2           |
| P-3OMe             | 84.2            | B-3OMe             | -83.9           |
| P-1CN              | 0               | B-1CN              | 0               |
| P-2CN              | 24.2            | B-2CN              | -42.7           |
| P-3CN              | 22.3            | B-3CN              | -34.1           |
| P-1F               | 0               | B-1F               | 0               |
| P-2F               | 106.4           | B-2F               | -101.7          |
| P-3F               | 108.9           | B-3F               | -109.8          |
| P-1Cl              | 0               | B-1Cl              | 0               |
| P-2Cl              | 73.9            | B-2Cl              | -69.7           |
| P-3Cl              | 71.5            | B-3Cl              | -70.2           |

## 5. Bond Dissociation Energy (BDE)

Some interesting outcomes (other than given in the main text) related to bond strength, its trends and its link to the relative thermodynamic stability of BN-fulvenes are given here in ESI. Notably, BDE pattern is given in Fig. 3, BDE values are given in Table 1, and bond order (BO) data is given in Fig. 6, in the main text.

- 1- Homolytic cleavage of the N/B–X bond in **P-1X/B-1X** fulvenes leads to higher value of BDE<sub>1</sub> for **P-1X** conforming their higher relative stability than the corresponding **B-1X**: such that **P-1F/B-1F** = 337.7/162.3 kcal mol<sup>-1</sup>, **P-1OMe/B-1OMe** = 273.8/130.9 kcal mol<sup>-1</sup>, **P-1Cl/B-1Cl** = 240.7/136.1 kcal mol<sup>-1</sup>, **P-1NH<sub>2</sub>/B-1NH<sub>2</sub>** = 273.7/155.4 kcal mol<sup>-1</sup> and **P-1CN/B-1CN** = 280.6/251.6 kcal mol<sup>-1</sup>, respectively.
- 2- Notably, the highest and the lowest BDE<sub>2</sub> differences (143.2/116.5 and 145.4/144.5 kcal mol<sup>-1</sup>) are observed for the pairs of isomers **P-1F/B-1F** and **P-1CN/B-1CN**, respectively, with the highest and the lowest  $\Delta E$  (200.5 kcal mol<sup>-1</sup>) among the **P/B-1X** isomers.
- 3- The calculated BDE (i.e., BDE<sub>3</sub>) supports stronger N–C<sub>(ring)</sub> bond in **P-1X** than B–C<sub>(ring)</sub> bond in **B-1X**: such that **P-1F/B-1F** = 274.4/242.9 kcal mol<sup>-1</sup>, **P-1OMe/B-1OMe** = 270.4/246.2 kcal mol<sup>-1</sup>, **P-1NH<sub>2</sub>/B-1NH<sub>2</sub>** = 264.5/251.0 kcal mol<sup>-1</sup> and **P-1CN/B-1CN** = 279.8/256.1 kcal mol<sup>-1</sup>.
- 4- According to the BO data, the butadiene part of the borole ring in **B-1X** fulvenes is not significantly affected by the exocyclic substitution, and the ring substitutions induce a small perturbation.
- 5- The BO data of fulvenes **B-2Y/P-2Y** and **B-3Y/P-3Y** are given as **B-2CN/P-2CN** = 1.14/1.10 and **B-3CN/P-3CN** = 1.10/1.10, **B-2Cl/P-2Cl** = 1.42/1.42 and **B-3Cl/P-3Cl** = 1.42/1.43, **B-2OMe/P-2OMe** = 1.38/1.37 and **B-3OMe/P-3OMe** = 1.39/1.38, **B-2F/P-2F** 1.38/1.41 and **B-3F/P-3F** = 1.41/1.40, **B-2NH<sub>2</sub>/P-2NH<sub>2</sub>** = 1.29/1.27 and **B-3NH<sub>2</sub>/P-3NH<sub>2</sub>** = 1.31/1.27.
- 6- The  $\Delta BO$  of the B–N bond in **B-3Z** (compared to **P-3Z**) fails to relate with  $\Delta E$ , where high bond strength meets with low stability and *vice versa*: **B-3NH<sub>2</sub>** (0.06, -19.6 kcal mol<sup>-1</sup>), **B-3OMe** (0.06, -14.8 kcal mol<sup>-1</sup>), **B-3F** (0.15, -18.2 kcal mol<sup>-1</sup>), **B-3Cl** (0.17, -11.7 kcal mol<sup>-1</sup>) and **B-3CN** (0.25, -4.8 kcal mol<sup>-1</sup>).

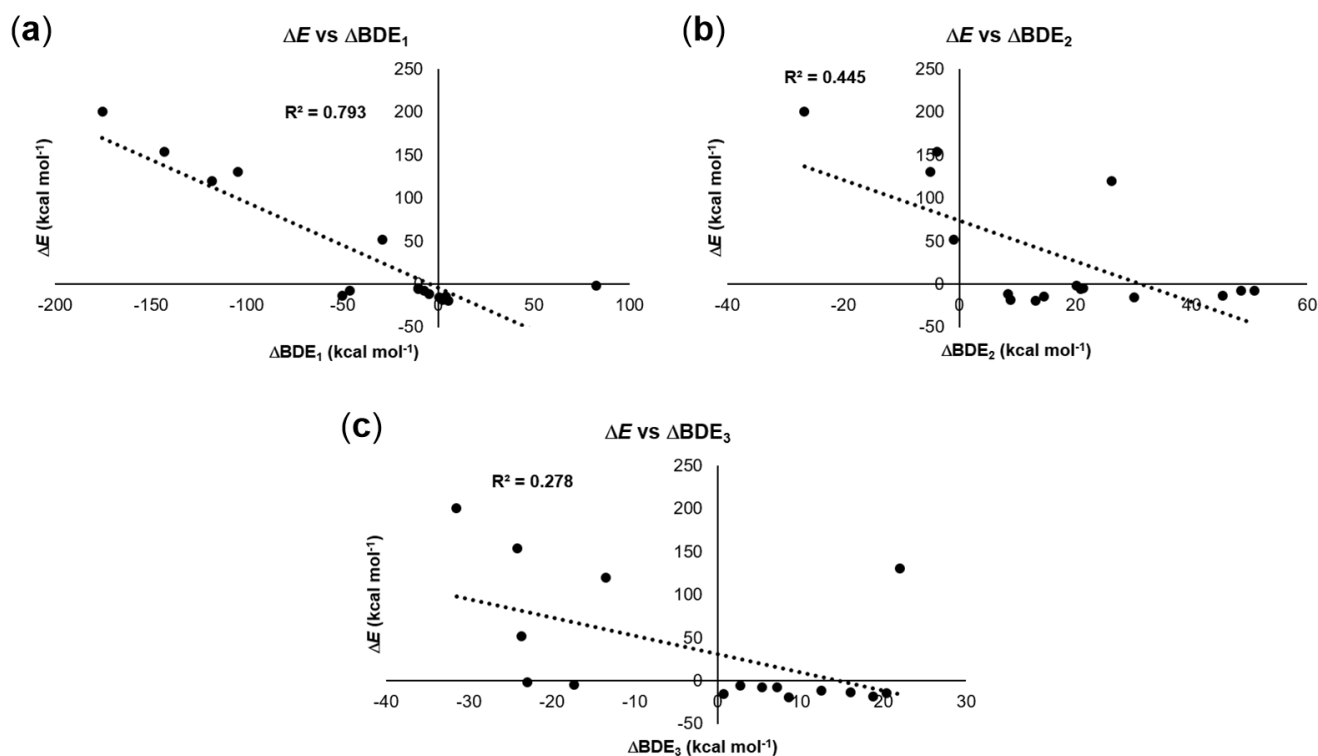

**Figure S5:** The linear relationship between  $\Delta E$  and (a)  $\Delta BDE_1$  calculated for the fulvene-substituent bond, (b)  $\Delta BDE_2$  calculated for the B–N bond, and (c)  $\Delta BDE_3$  calculated for the ring B/N–C<sub>ring</sub> bond.

## 6. Aromaticity Indices: NICS(1)<sub>zz</sub>, $\Delta BL$ , and Electron Density of Delocalized Bonds (EDDB)

Although the parent fulvene shows values of delocalization indices in-between **P** and **B** fulvenes, i.e.,  $EDDB(G) = 2.021 e$  and  $EDDB(P) = 0.426 e$  (Fig. S7). The negative NICS(1)<sub>zz</sub> (-12.3 to -29.5 ppm), smaller  $\Delta BL$  (0.054–0.108 Å) and larger  $EDDB(G)$  values (3.154–4.939  $e$ ) (Table 2) affirm **P** fulvenes (**P-1X**, **P-2Y** and **P-3Z**) as aromatic species. However, their lower aromaticity compared to the parent pyrrole (C<sub>4</sub>H<sub>5</sub>N that have NICS(1)<sub>zz</sub> = -32.5 ppm and  $\Delta BL = 0.050$  Å, (Table 2) is linked to the presence of an exocyclic boryl group (in each structure) mounted at the ring N atom that interacts with the N's delocalized lone-pair (that one can visualize through  $EDDB(G)$  in Fig. S8a). The  $EDDB(G)$  value in **P** fulvenes is found more or less than that of the parent pyrrole (4.100  $e$ ) because of the consideration of delocalization of the whole system (Fig. S8a). However, ring  $EDDB$  index,  $EDDB(P)$  of **P** fulvenes (0.936–2.497  $e$ ) show lower values than that of pyrrole (2.978  $e$ ) (Fig. S8b) revealing reduced aromaticity, thus complying NICS(1)<sub>zz</sub> and  $\Delta BL$  results.  $EDDB(P)$  isosurfaces of **P** fulvenes reveal strong ring delocalization that correlate well to their geometry revealing CC bond (that is next to endocyclic N) is the strongest ring bond in all **P** fulvenes, and CC bond opposite to endocyclic N is the weakest in **P-3Z** fulvenes. On the other hand, **B** fulvenes are revealed to be significantly less antiaromatic (NICS(1)<sub>zz</sub> = 11.2–27.7 ppm,  $\Delta BL = 0.142$ –0.184 Å, and  $EDDB(P) = 0.138$ –0.241  $e$ ) compared to the parent borole C<sub>4</sub>H<sub>5</sub>B (NICS(1)<sub>zz</sub> = 34.8 ppm,  $\Delta BL = 0.179$  Å, and  $EDDB(P) = 0.115 e$ ) (Table 2, Fig. S7 and S8b). The reduction in the antiaromaticity of **B** fulvenes could be linked to lone-pair donation by the exocyclic amine group (in each structure) mounted on B atom of the ring. Further, substituents also actively participate in enhancing ring  $\pi$ -delocalization, displayed by  $EDDB(G)$  values (1.217–3.047  $e$ ). However,  $EDDB(P)$  isosurfaces of **B-1X** fulvenes visualized in Fig. 8a reveal delocalization is divided into two parts; the exocyclic framework and two separate ring CC bonds. On the other hand, ring-substitution in **B** fulvenes interacts well with the butadiene fragment, bypassing the endocyclic B atom, as observed from the  $EDDB(G)$  isosurfaces (Fig. S8a). The  $EDDB(P)$  isosurfaces reveal almost no ring delocalization (Fig. S8b).

Generally, it is found that a substituent reducing aromaticity of **P** fulvene also reduces its relative stability compared to the corresponding **B** fulvene, and contrarily, a substituent reducing antiaromaticity of **B** fulvene enhances its stability compared to the relevant **P** fulvene. Therefore, in general, based on NICS(1)<sub>zz</sub>, **P** fulvenes display the following decreasing order of aromaticity for  $\pi$ -ED groups **P-1X** > **P-3Z** > **P-2Y**, and for  $\sigma$ / $\pi$ -EW CN group **P-2Y**  $\approx$  **P-3Z** > **P-1X**. Interestingly, this aromaticity trend in **P** fulvenes is quite similar to the previously reported trend for undoped fulvenes.<sup>1</sup> Further, aromaticity trend of **P** fulvenes, except CN-substituted ones, follow the stability trend of their positional isomers (Table S3). On the other hand, the decreasing antiaromaticity trend observed for **B** fulvenes is given as for those having  $\pi$ -ED groups **B-2Y** > **B-1X** > **B-3Z** and bearing CN groups **B-1X** > **B-3Z**  $\approx$  **B-2Y**.

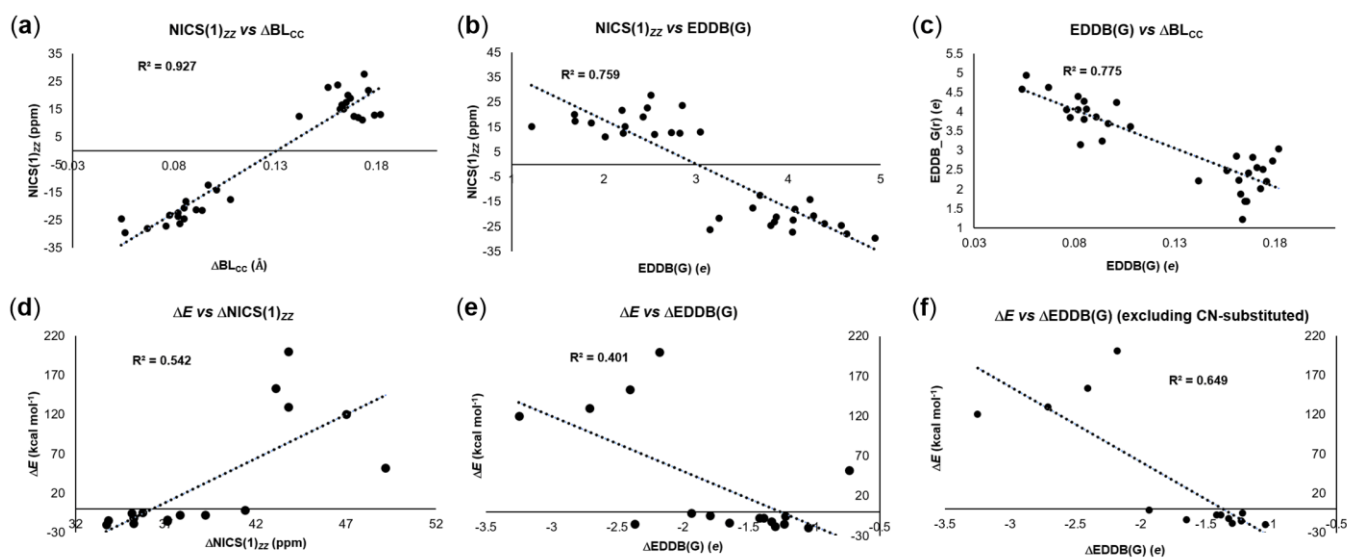

**Figure S6:** (Above) Linear relation between aromaticity indices themselves (a-c). (Below) Linear relationship between  $\Delta E$  and aromaticity indices (d-f) of the corresponding BN-fulvenes. Data is taken from Table 2.

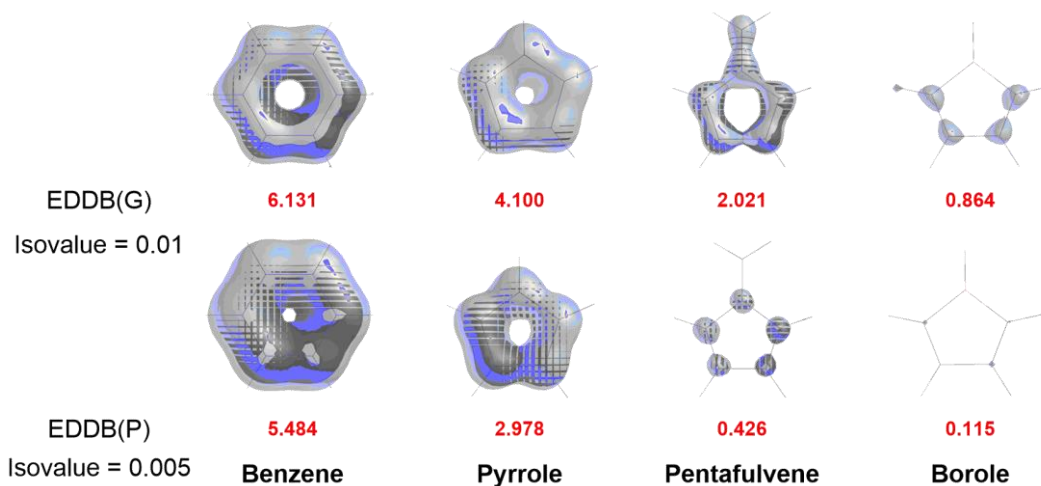

**Figure S7.** EDDB values (e) of the parent benzene, pyrrole, fulvene, and borole: (above) the total population of delocalized electrons in molecule (i.e., EDDB(G)), and (below) total population of delocalized electrons in 5-membered ring (5MR) (i.e., EDDB(P)). The given isosurfaces are visualized in Avogadro software from the corresponding EDDB(G/P) fchk files.

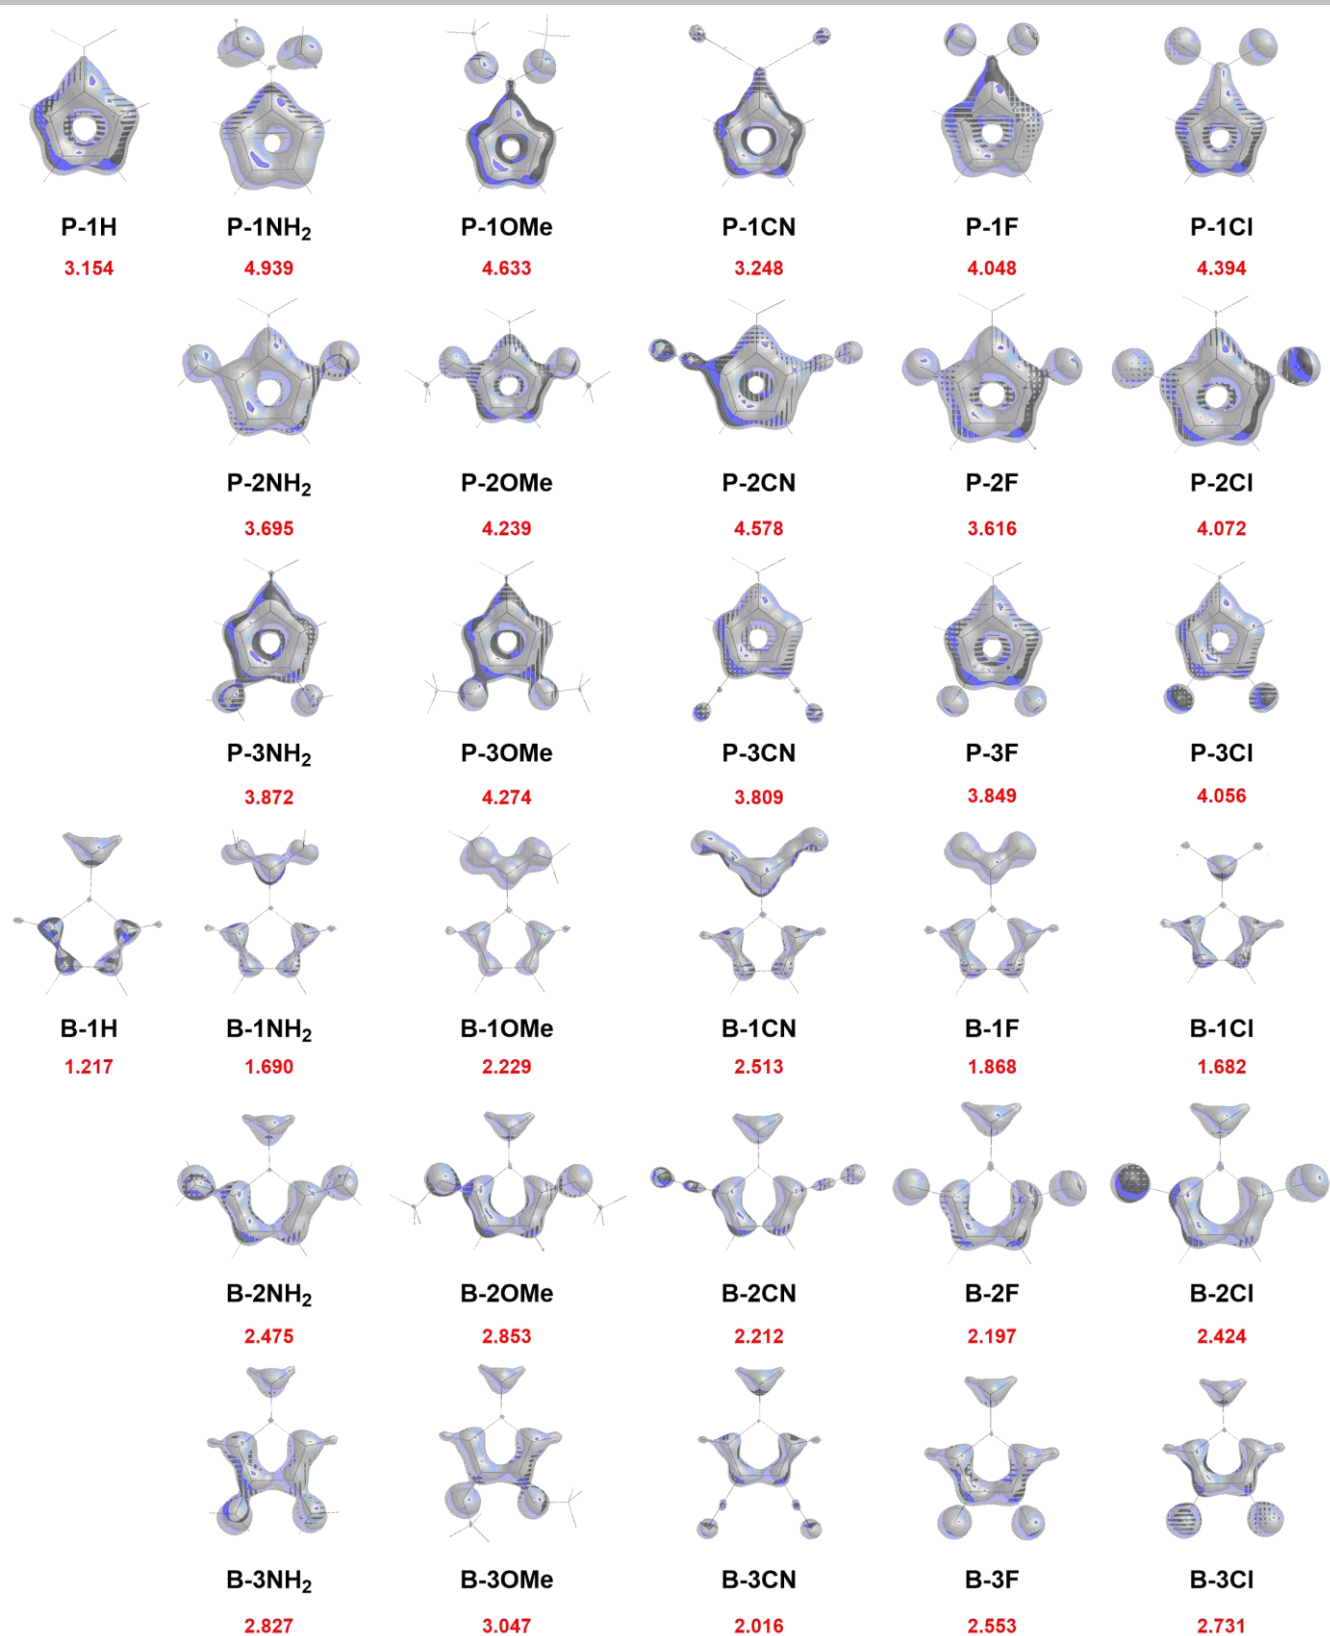

**Figure S8a.** Total population of delocalized electrons in molecule (i.e., EDDB(G)) values (*e*) of BN-fulvenes. The given isosurfaces are visualized in Avogadro software from the fchk files of EDDB(G), where the isosurface value = 0.01.

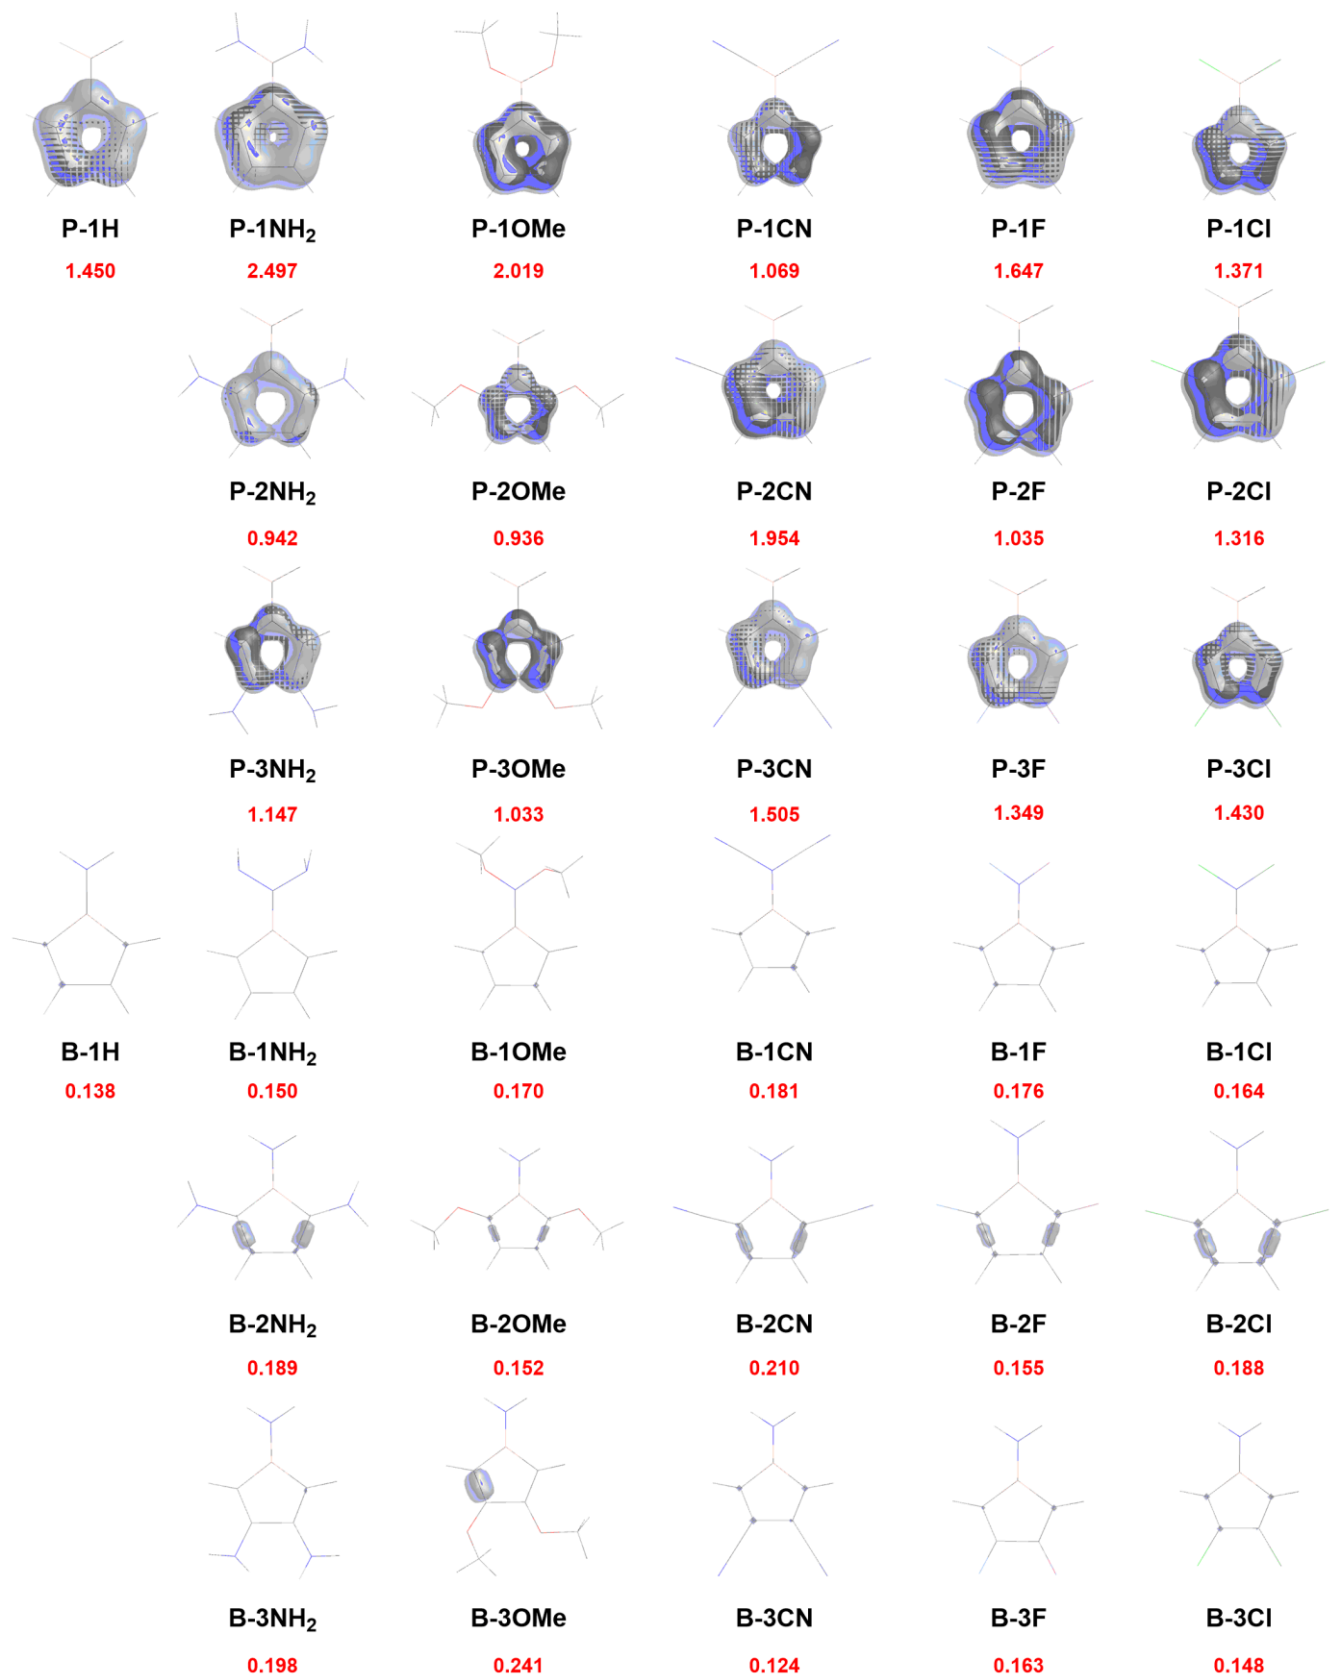

**Figure S8b.** Total population of delocalized electrons in 5-membered ring (5MR) (i.e., EDDB(P) values ( $e$ ) of BN-fulvenes. The given isosurfaces are visualized in Avogadro software from the fchk files of EDDB(P), where the isosurface value = 0.005.

## 7. Dipole Moment and Natural Population Analysis (NPA) Charges

Dipole moment ( $\mu$ ) measured in debye (D) demonstrates that its higher value indicates higher polarity and stronger interactions. The calculated  $\mu$  of the parent fulvene (0.6 D) is intermediate to that of pyrrole (1.9 D) and borole (-0.8 D). BN-doping reduces  $\mu$  of the parent fulvene to approximately zero in **P-1H** (Fig. S9), and  $\mu$  of **B-1H** is 1.6 D that is closer to pyrrole. The  $\mu$  for the exocyclic BN-fulvenes **P-1X** and **B-1X** are very close to each other. However,  $\text{NH}_2$ -, OMe- and CN-substituted fulvenes show higher  $\mu$  than those of F- and Cl-substituted ones.

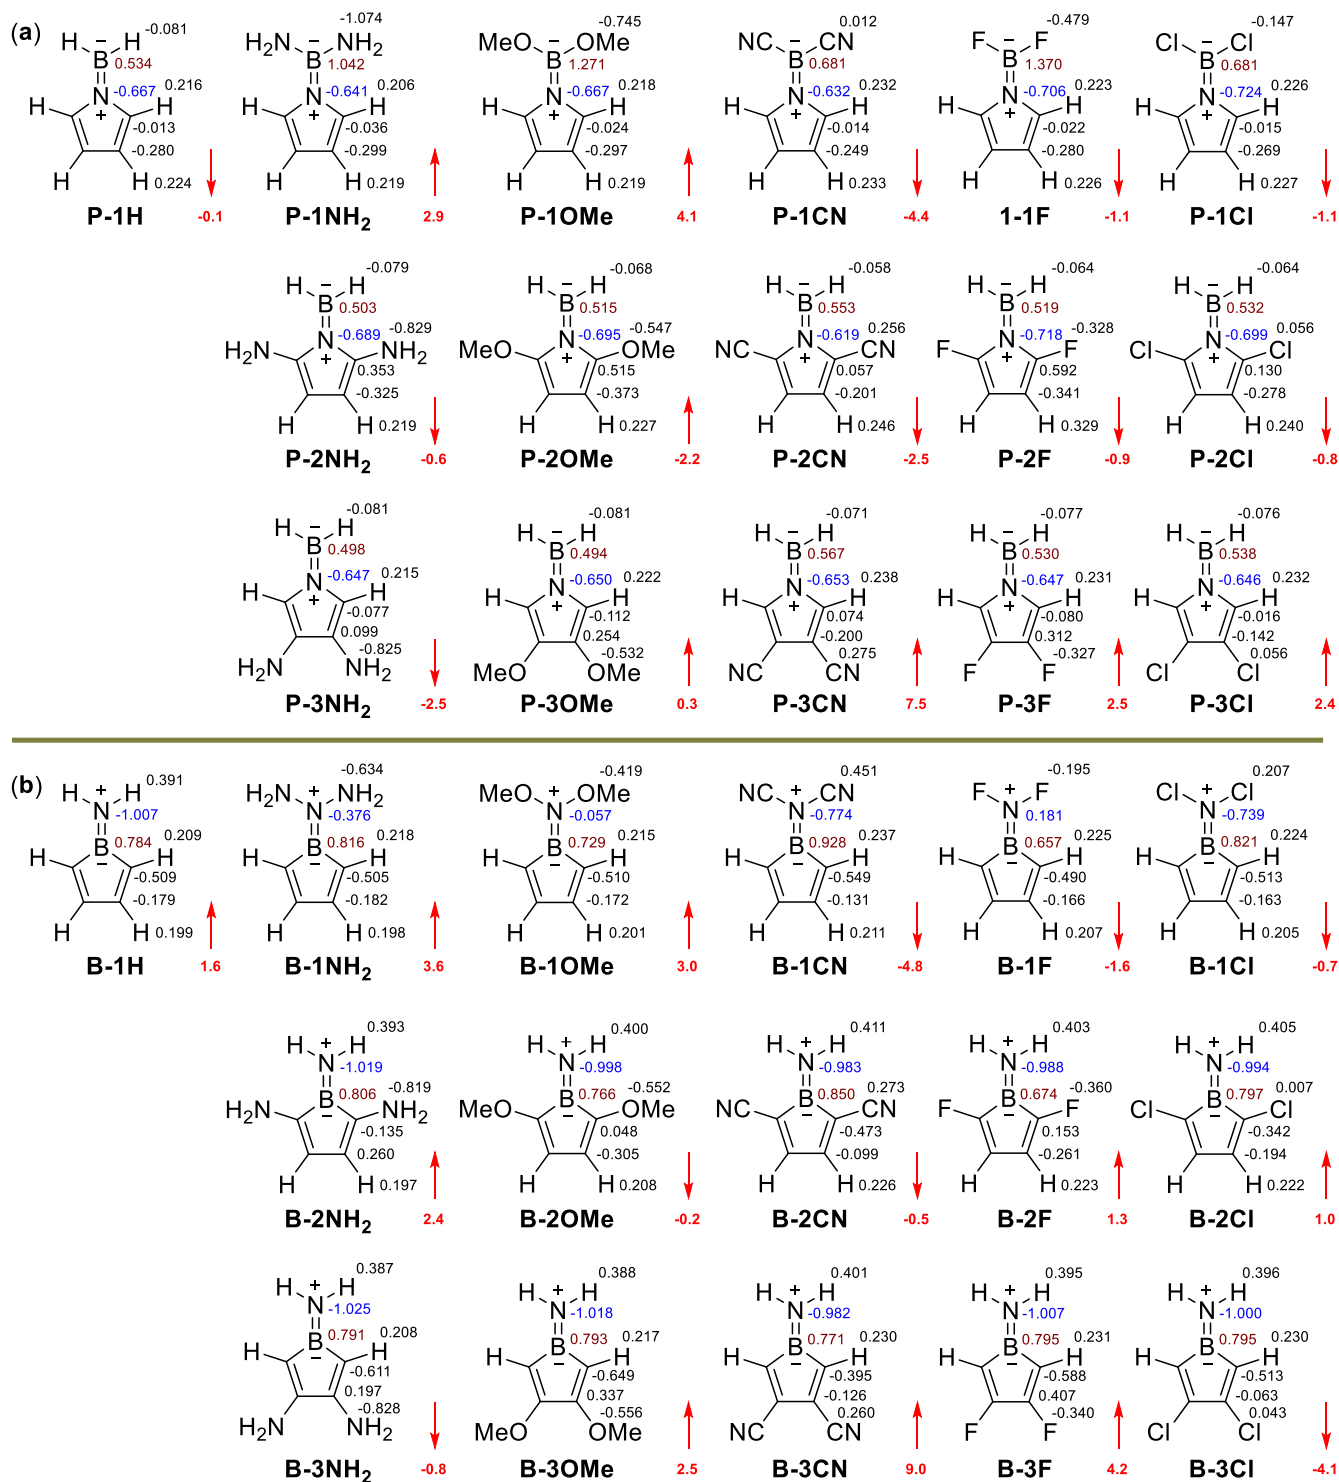

Figure S9. NPA charges ( $e$ ) given on the corresponding atoms and dipole moments (D, given in red color) of BN-fulvenes (a) **P** and (b) **B**.

When NPA charges on N and B across the B=N bond within a BN-fulvene are added, irrespective of their signs, lead to the term  $\Delta q(\text{N-B})$ , that is represented as  $\Delta q(\text{N-B})_{\text{P}}$  and  $\Delta q(\text{N-B})_{\text{B}}$  for **P** and **B** fulvenes, respectively (Table 3). This term reveals greater charge accumulation across the B=N bond leads to more stable BN-fulvene isomer and *vice versa*. Further, the relative term  $\Delta\Delta q(\text{N-B})$  for the two corresponding isomers reflects the amount of  $\Delta q(\text{N-B})$  could define the magnitude of the relative stability ( $R^2 = 0.865$ , in Fig. S10a).

However, the term  $\Sigma q(\text{N+B})$  that calculates the net charge across the B=N bonds, i.e., the sum of B and N charges in the corresponding **P** and **B** fulvenes (where  $\Sigma q(\text{N+B})_{\text{P}} = q(\text{N})_{\text{P}} + q(\text{B})_{\text{P}}$  and  $\Sigma q(\text{N+B})_{\text{B}} = q(\text{N})_{\text{B}} + q(\text{B})_{\text{B}}$ , respectively), explains that **P** isomers are stabilized when the B=N bond accumulates

more positive charge, while **B** isomers are stabilized when this charge sum is more negative. Therefore, linking to the electron-rich and electron-deficient behavior of the rings in the two BN-fulvenes, respectively, where the former could stabilize positive charge and the latter could stabilize negative charge. This trend is exemplified by the most stable species at each position, namely **P-1F**, **B-2CN** and **B-3NH<sub>2</sub>** (Fig. S4). These correlations exhibit excellent linear relationship  $\Delta E$  ( $R^2 = 0.816$  and  $0.902$ , respectively, in Fig. S10b and 10c).

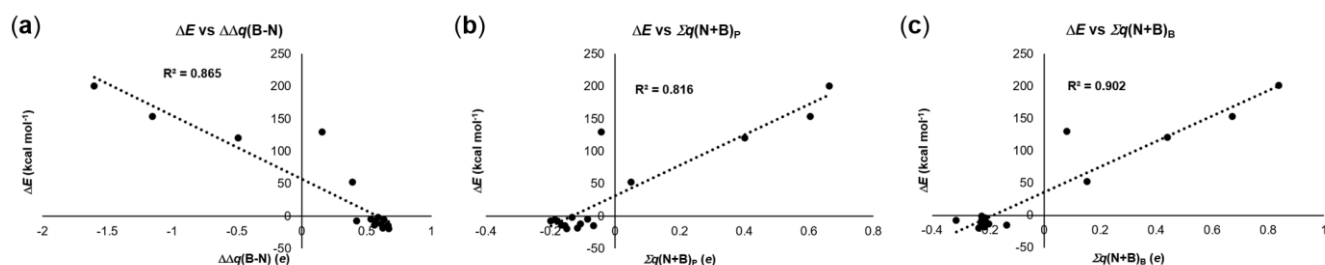

**Figure S10.** (a) Linear relationship between  $\Delta E$  and the difference of NPA charges ( $e$ ) across the B=N bond of **B** fulvene relative to **P** fulvene, i.e.,  $\Delta\Delta q (= \Delta q(\text{B}) - \Delta q(\text{N})$  or  $= \Delta q(\text{B-N})$ ), and (b) and (c) the sum of charges across the B=N bond, i.e.,  $\Sigma q(\text{N+B})_P$  in **P** fulvenes and **B** fulvenes, respectively.

## 8. Frontier Molecular Orbitals (FMOs)

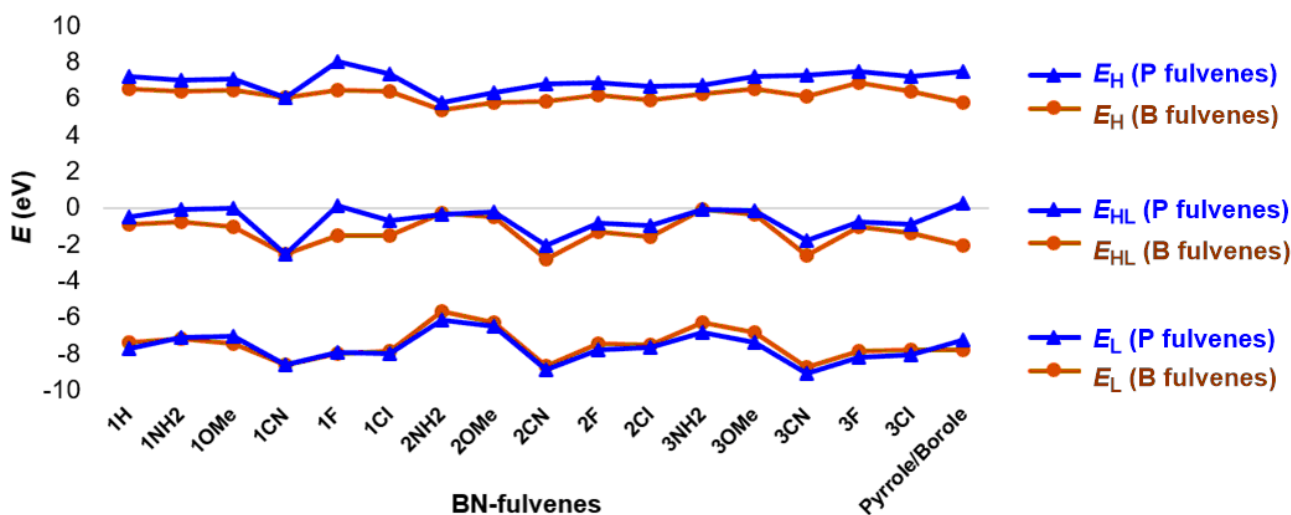

**Figure S11.** Frontier molecular orbital (FMOs) energies and gaps of BN-fulvenes.

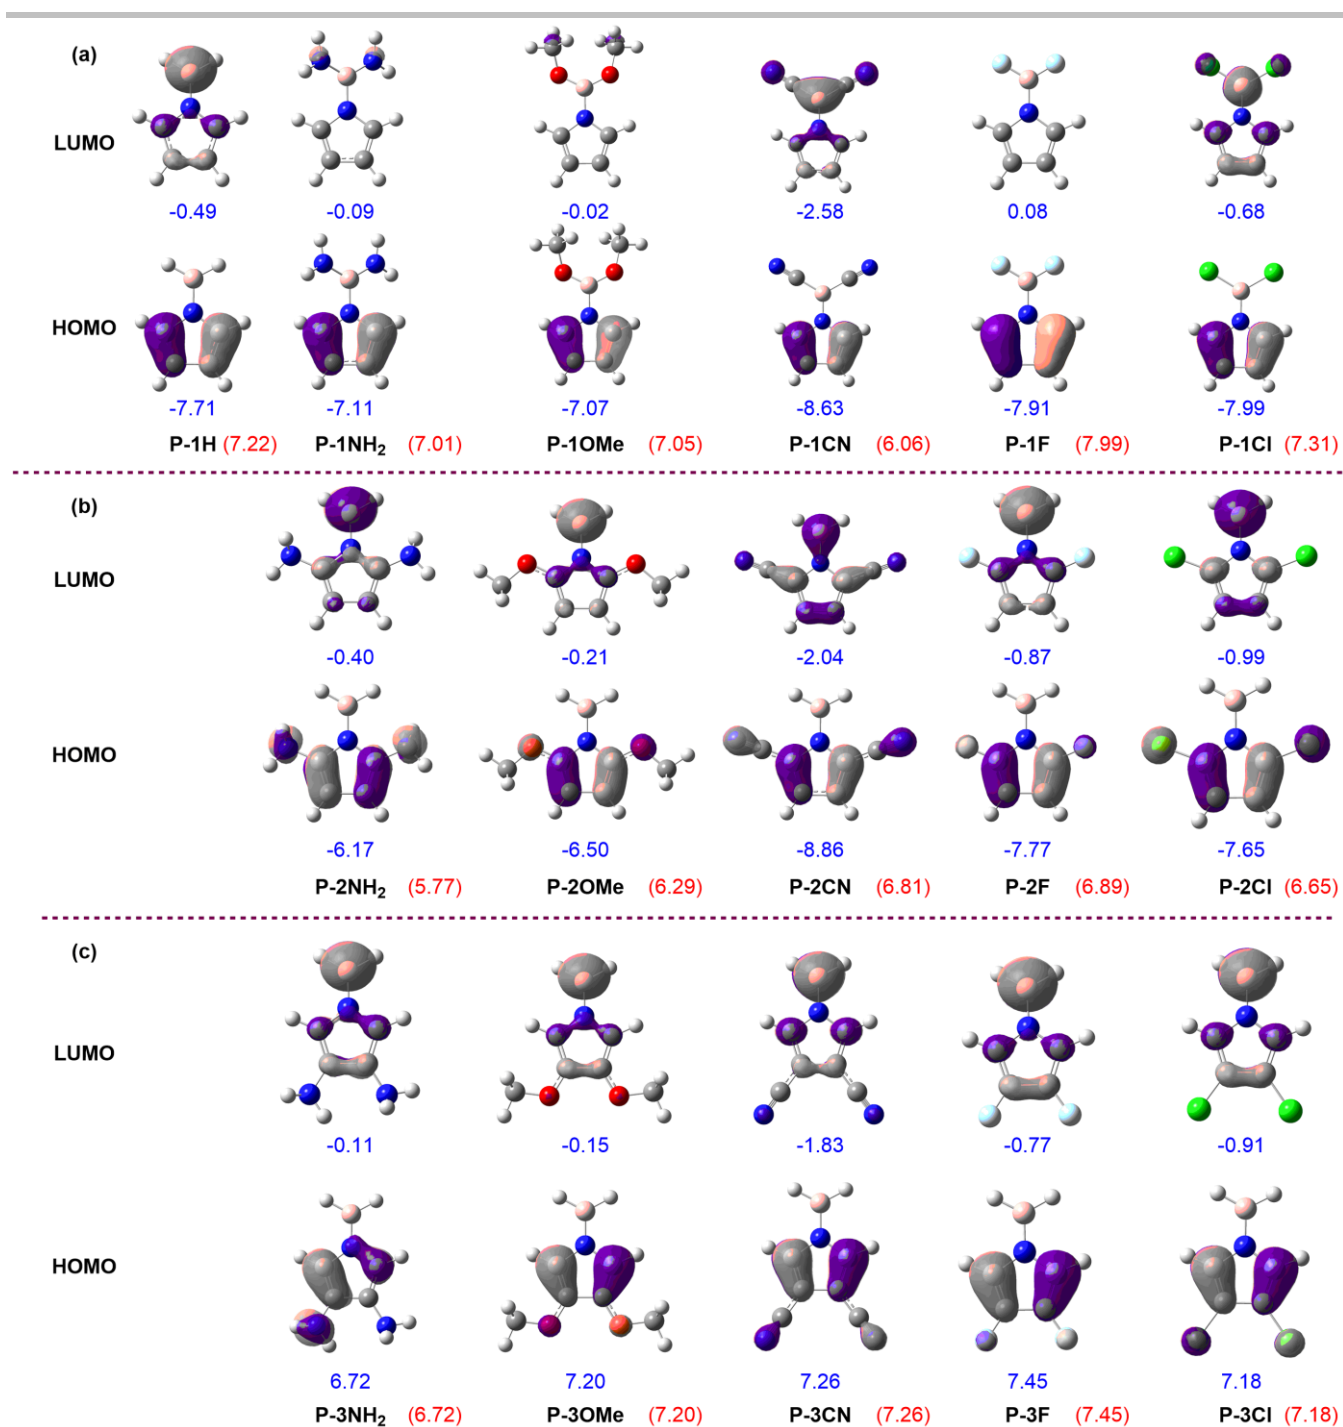

Fig. S12. FMOs of P fulvenes, their energies (in blue color) and gaps (in red color). Atom's color code: H (white), C (grey), N (blue), B (pink), O (red), F (cyan), and Cl (green).

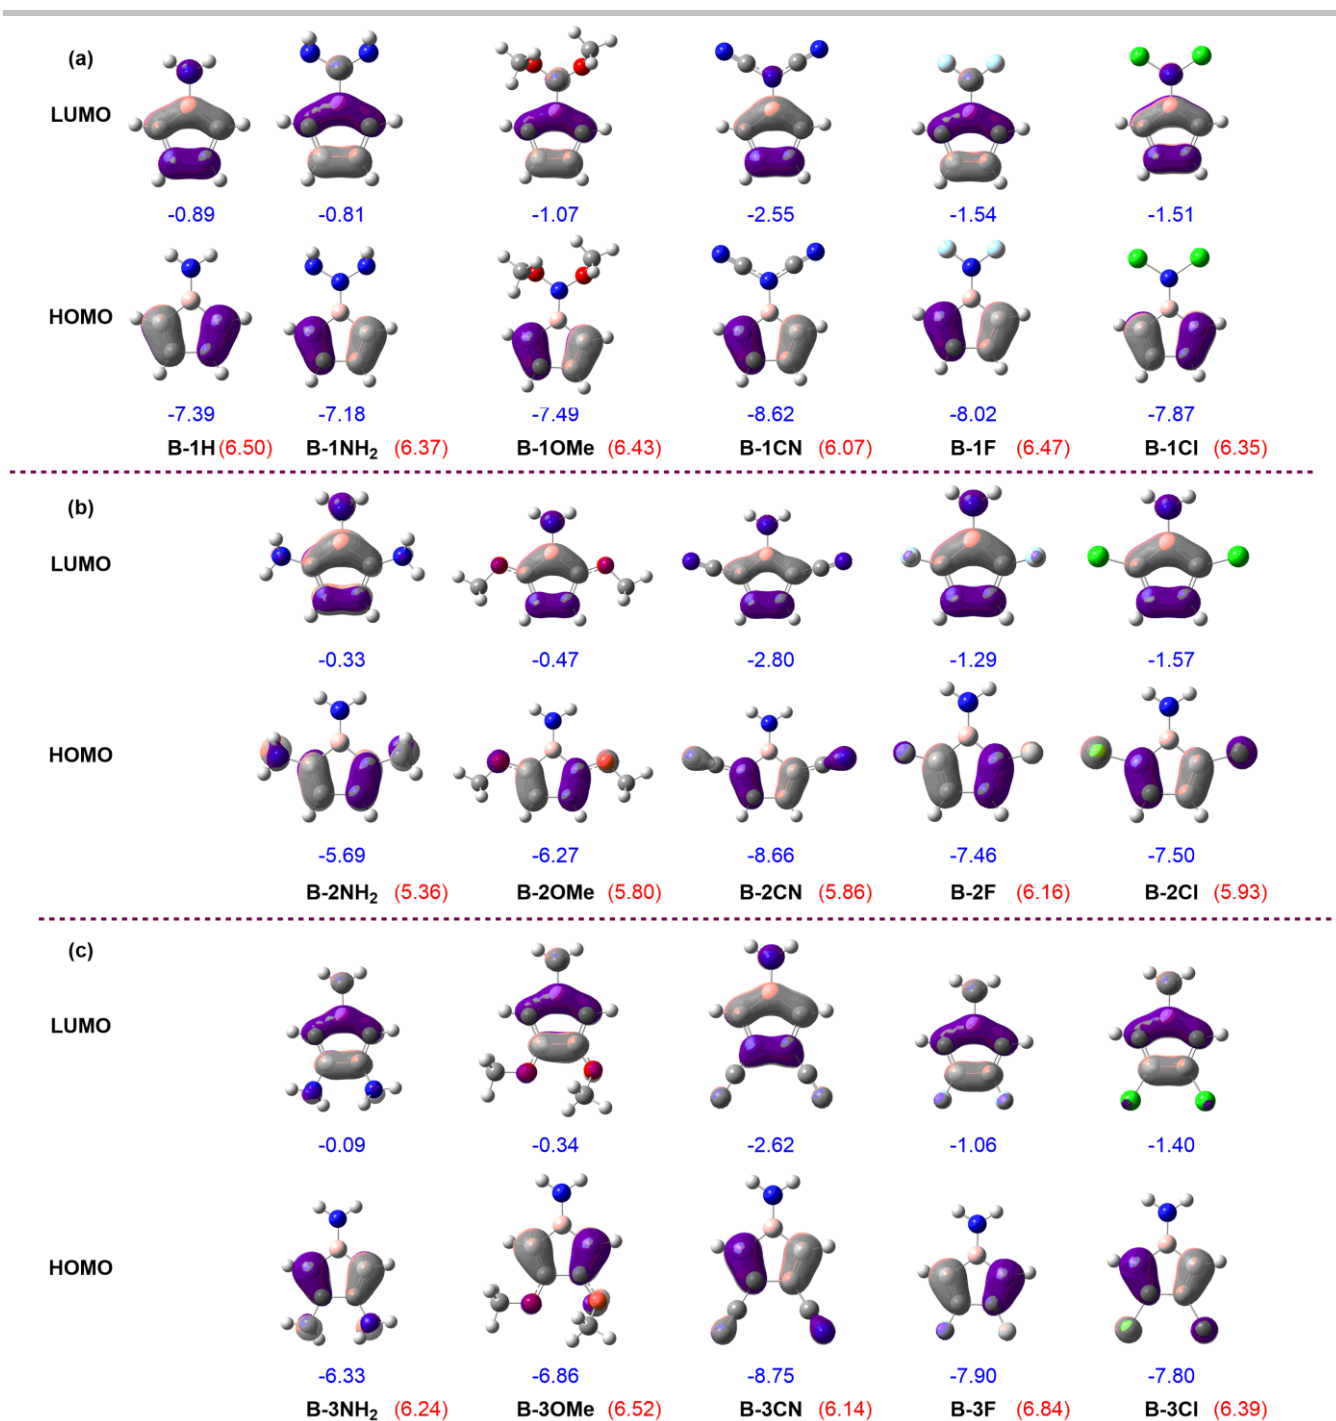

**Figure S13.** FMOs of **B** fulvenes, their energies (in blue color) and gaps (in red color). Atom's color code: H (white), C (grey), N (blue), B (pink), O (red), F (cyan), and Cl (green).

Generally, **P** isomers display stabilized HOMOs ( $E_H = -6.17$  to  $-9.09$  eV) compared to the corresponding **B** isomers ( $E_H = -5.69$  to  $-8.75$  eV), except for the exocyclic substituted fulvenes **B-1NH<sub>2</sub>**, **B-1OMe** and **B-1F** that display slightly more stable HOMOs than the corresponding isomers **P-1NH<sub>2</sub>**, **P-1OMe**, and **P-1F** ( $E_H = -7.18$  vs  $-7.11$  eV,  $-7.49$  vs  $-7.0$  eV, and  $-8.02$  vs  $-7.91$  eV, respectively). On the other hand, LUMOs of **B** isomers are found stabilized ( $E_L = -0.09$  to  $-2.80$  eV) than the corresponding **P** isomers ( $E_L = 0.08$  to  $-2.58$  eV), except **B-1CN**, **B-2NH<sub>2</sub>** and **B-3NH<sub>2</sub>** that are more stable than **P-1CN**, **P-2NH<sub>2</sub>**, and **P-3NH<sub>2</sub>** ( $E_L = -2.55$  vs  $-2.58$  eV,  $-0.33$  vs  $-0.40$  eV and  $-0.09$  vs  $-0.11$  eV, respectively). It generalizes lower electron affinity and higher reactivity of **B** compounds.

On substituting **B-1H** fulvenes derivatives display reduced HOMO-LUMO gap (here denoted as  $E_{HL}$ ) ( $E_{HL} = 5.36$ – $6.50$  eV), except **B-3OMe** and **B-3F** that get slightly higher  $E_{HL}$  (6.52 and 6.84 eV). The  $\sigma$ - and  $\pi$ -EW CN-substituted **B** fulvenes (**B-1CN**, **B-2CN** and **B-3CN**) get the lowest  $E_{HL}$  (6.07, 5.86 and 6.16 eV) among BN-fulvene due to higher gain in stability of their LUMOs (1.66–1.91 eV) compared to the parent **B-1H**. Thus announcing these species as the most reactive among BN-fulvenes. However, competition between  $\pi$ -ED and  $\sigma$ -EW character in the other groups gives mixed results.

On the other hand, most of the **P** fulvenes display higher  $E_{HL}$  (6.65–7.99 eV) than the parent fulvene (6.45 eV), indicating higher stability. However, few examples like **P-1CN**, **P-2NH<sub>2</sub>** and **P-2OMe** (where  $\Delta E_{HL} = 6.06$ , 5.77 and 6.29 eV, respectively) exhibit enhanced reactivity. Further, every **P** fulvene shows higher gap than the corresponding **B** fulvene, indicating latter fulvenes are prone to higher reactivity, and easy to excite.

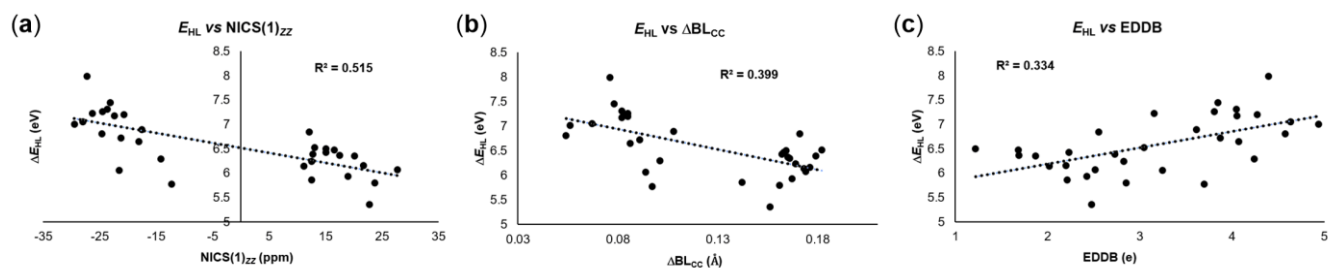

**Figure S14.** Linear relationships between HOMO-LUMO energy gaps ( $E_{HL}$ ) and aromaticity indices: (a)  $E_{HL}$  vs  $NICS(1)_{ZZ}$ , (b)  $E_{HL}$  vs  $\Delta BL_{CC}$  and (c)  $E_{HL}$  vs  $EDDB(G)$  of BN-fulvenes (data from Table 2).

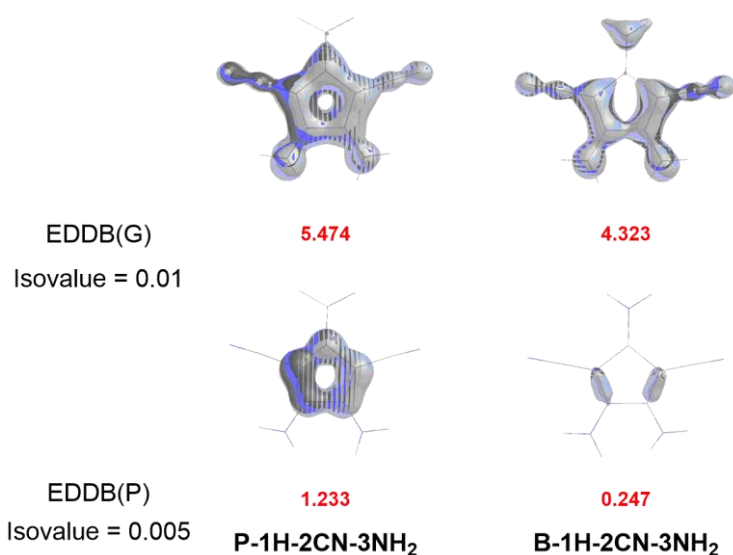

**Figure S15.** Total population of delocalized electrons in molecule and 5-membered ring (SMR) (i.e.,  $EDDB(G)$ , above, and  $EDDB(P)$ , below) values (e) of BN-fulvene complexes. The given isosurfaces are visualized in Avogadro software from the fchk files of  $EDDB(G/P)$ .

## 9. Cartesian Coordinates and Absolute Energies (Es)

Absolute energies and Cartesian coordinates are provided separately in .xyz file.

## 10. Reference

<sup>1</sup> S. Yadav, O. E. Bakouri, K. Jorner, H. Tong, C. Dahlstrand, M. Solà, H. Ottosson, *Chem. Eur. J.*, 2019, **14**, 1870.
